# Supplementary material for: Reprogramming the Intrahepatic Cholangiocarcinoma Immune Microenvironment by Chemotherapy and CTLA-4 Blockade Enhances Anti–PD-1 Therapy
Source: Oxford University Press journal article supplement (doi:10.1158/2326-6066.cir-23-0486), 2024-01-22
Supplement: cir-23-0486_supplementary_fig.s12_supps12.pdf [file cir-23-0486_supplementary_fig.s12_supps12.pdf]

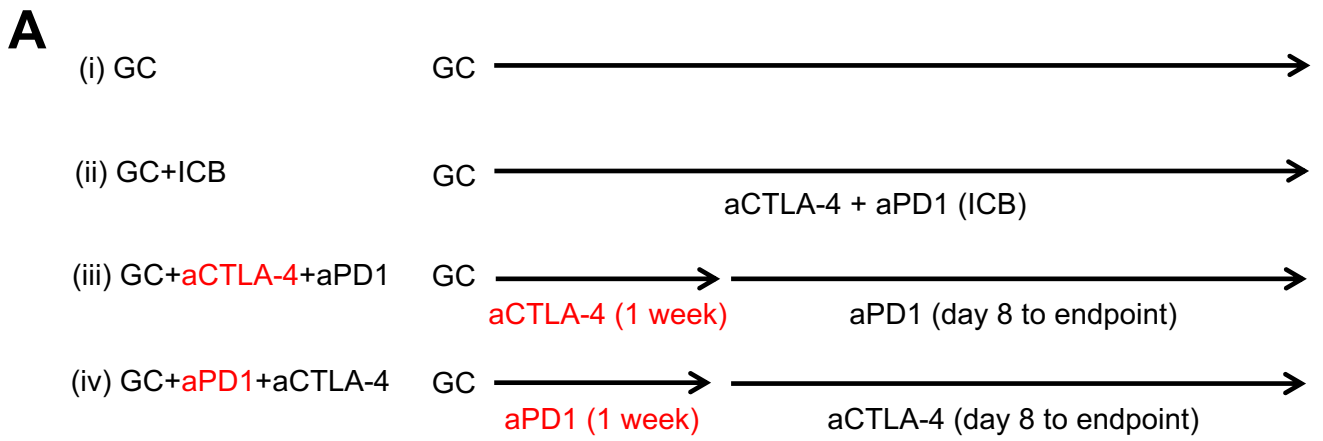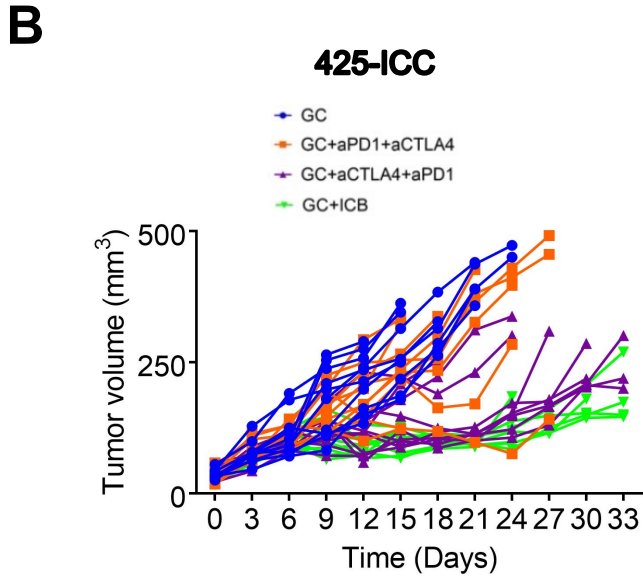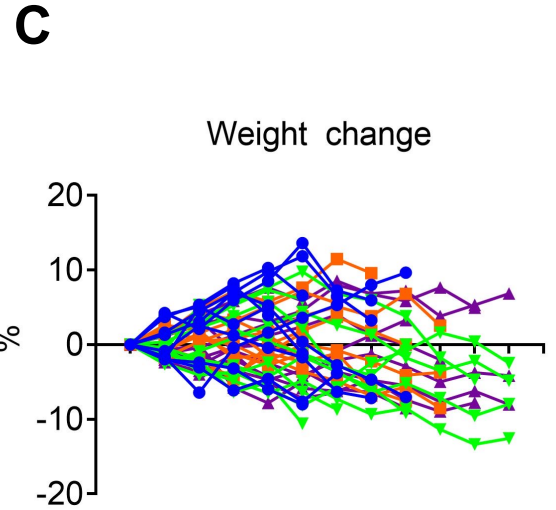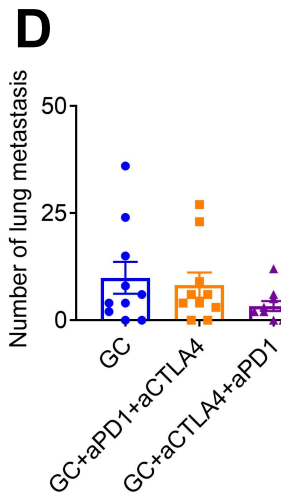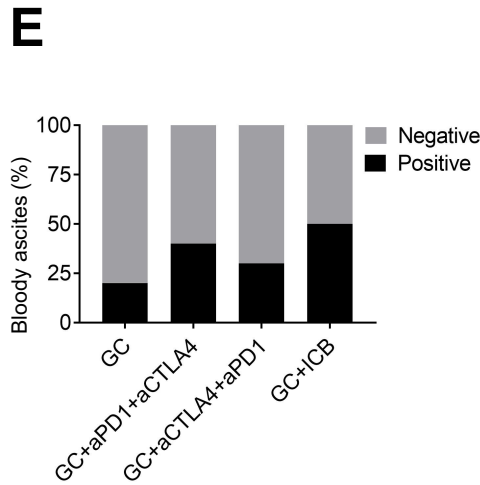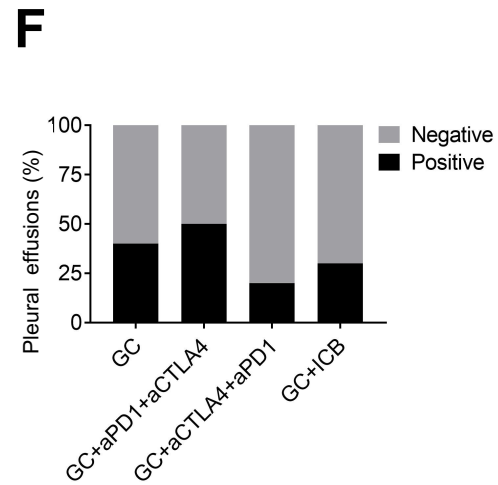

**Supplementary Fig. S12: Effect of ICB treatment scheduling on efficacy and toxicity. (A)** Treatment groups and sequencing of treatments; GC, gemcitabine/cisplatin. **(B)** Individual tumor growth kinetics. **(C)** Changes in body weight. **(D)** Lung metastatic burden. **(E, F)** Incidence of bloody ascites **(E)**, and pleural effusions **(F)**.
